1 **Multi-trait genetic analysis identifies novel pleiotropic loci for depression and**  
2 **schizophrenia in East Asians**

3

4 Yingchao Song<sup>1,#</sup>, Linzehao Li<sup>1,#</sup>, Yue Jiang<sup>1</sup>, Bichen Peng<sup>1</sup>, Hengxuan Jiang<sup>1</sup>, Zhen Chao<sup>1</sup>, Xiao  
5 Chang<sup>1,\*</sup>.

6 1. College of Artificial Intelligence and Big Data for Medical Sciences, Shandong First Medical  
7 University & Shandong Academy of Medical Sciences, Shandong, China

8

9

10

11 \*. Correspondence to Xiao Chang, PhD, 6699 Qingdao Road, Jinan, China; e-mail:

12 [changxiao@sdfmu.edu.cn](mailto:changxiao@sdfmu.edu.cn)

13

14 Running title: multi-trait analysis of depression and SCZ in East Asians

15

16 *Abstract*

17

18 While genetic correlations, pleiotropic loci, and shared genetic mechanisms of psychiatric  
19 disorders have been extensively studied in European populations, the investigation of these  
20 factors in East Asian populations has been relatively limited. To identify novel pleiotropic risk  
21 loci for depression and schizophrenia (SCZ) in East Asians. We harnessed the most  
22 comprehensive dataset available for East Asians and quantified the genetic overlap between  
23 depression, SCZ, and their related traits via LD Score regression (LDSC) analyses. Besides the  
24 correlation between depression and SCZ, our analysis revealed significant genetic correlations  
25 between depression and obesity-related traits, such as weight, BMI, T2D, and HDL. In SCZ,  
26 significant correlations were detected with HDL, heart diseases and use of various medications.  
27 Conventional meta-analysis of depression and SCZ identified a novel locus at 1q25.2 in East  
28 Asians. Moreover, this locus was verified in the multi-trait analysis of GWAS (MTAG), which  
29 can improve the statistical power of single-trait GWAS by incorporating information from effect  
30 estimates across genetically correlated traits. Furthermore, multi-trait analysis of depression,  
31 SCZ and related traits identified ten novel pleiotropic loci for depression, and four for SCZ. Our  
32 findings demonstrate shared genetic underpinnings between depression and SCZ in East Asians,  
33 as well as their associated traits, providing novel candidate genes for the identification and  
34 prioritization of therapeutic targets specific to this population.

## 35 *Introduction*

36

37 Psychiatric disorders comprise a range of severe illnesses that result in emotional, cognitive, or  
38 behavioral disturbances in individuals, making them a significant contributor to the global  
39 burden of disability [1]. Empirical studies indicate that psychiatric disorders result from the  
40 intricate interplay of genetic and environmental risk factors [2]. Heritability estimates, as  
41 determined by twin-based and genome-wide association studies (GWAS), emphasize the  
42 substantial role of genetic factors within the spectrum of psychiatric disorders [3-6]. Specifically,  
43 the heritability estimates for major depression are approximately 30%-40% [7], while for  
44 schizophrenia (SCZ), these estimates range from 65% to 80% [8-10].

45

46 Depression and SCZ both exhibit a substantial degree of polygenicity, with numerous risk loci  
47 have been identified through genome-wide association studies (GWAS) in individuals of  
48 European ancestry [6, 11]. In a recent study, the largest GWAS of depression, involving more  
49 than 1.3 million individuals (including 371,184 with depression), identified a total of 243 risk  
50 loci. This study also unveiled a critical role of neurodevelopmental pathways associated with  
51 prenatal GABAergic neurons, astrocytes and oligodendrocyte lineages [12]. For SCZ, a total of  
52 287 significant loci have been identified in the largest GWAS encompassing 76,755 cases and  
53 243,649 controls. These identified associations predominantly cluster within genes that are  
54 actively expressed in both excitatory and inhibitory neurons within the central nervous system  
55 [13]. However, the majority of previous genetic studies have been performed in European  
56 ancestry cohorts, leaving a conspicuous research gap in Asian populations. The largest GWAS of  
57 depression in East Asians (15,771 cases and 178,777 controls) only identified two genetic loci  
58 [14]. Similarly, the largest GWAS conducted on SCZ among individuals of East Asian origin  
59 (with 22,778 cases and 35,362 controls) identified 19 genetic loci [15], which is significantly  
60 fewer than those observed in European studies.

61

62 Recently, the emergence of multi-trait analysis of GWAS (MTAG) has brought forth a powerful  
63 approach to explore the genetic overlap and shared causality among complex traits [16]. By  
64 conducting meta-analysis of GWAS summary statistics for different genetically correlated traits,  
65 multi-trait analysis can enhance the statistical power and pinpoint pleiotropic genetic variants  
66 that influence interrelated traits. Moreover, it reveals the intricate genetic interplay existing

67 between these phenotypes and unveils the common biological pathways that underpin their  
68 development. Such cross-trait analysis methods have been successfully applied to the study of  
69 psychiatric disorders. For example, a multi-trait meta-analysis across eight psychiatric disorders  
70 identified 109 pleiotropic loci linked to at least two disorders, revealing the common genetic  
71 structures shared among different psychiatric disorders [6]. Besides, a multi-trait meta-analysis  
72 revealed a substantial number of pleiotropic genetic loci between psychiatric disorder and  
73 gastrointestinal tract diseases, emphasizing the shared biological mechanism concerning immune  
74 response, synaptic structure and function, and potential gut microbiome in these conditions [17].  
75 To the best of our knowledge, multi-trait analysis of GWAS has predominantly centered on  
76 European populations, and, no such analysis has been undertaken for psychiatric disorders within  
77 East Asian populations so far.

78  
79 In this study, we conducted a comprehensive multi-trait analysis using GWAS data of depression  
80 and SCZ in cohorts of East Asian descent. We also investigated the deep-phenotype GWAS data  
81 encompassing a range of health aspects such as diseases, biomarkers and medication usage  
82 sourced from BioBank Japan (BBJ) [18]. Moreover, we performed analyses to quantify both  
83 overall and local genetic correlations, further identifying novel pleiotropic loci for depression  
84 and SCZ in East Asians.

85 *Methods*

86

87 GWAS data

88

89 The hitherto largest GWAS meta-analysis of depression among individuals of East Asia was  
90 performed among 194,548 individuals (15,771 cases and 178,777 controls), based on combined  
91 data from the China, Oxford, and Virginia Commonwealth University Experimental Research on  
92 Genetic Epidemiology (CONVERGE) consortium [19], China Kadoorie Biobank (CKB), and the  
93 Taiwan-Major Depressive Disorder (MDD) study, as well as studies conducted in the US and  
94 UK that included participants of East Asian ancestry [14]. And the largest GWAS of SCZ among  
95 individuals across East Asia were compiled 22,778 SCZ cases and 35,362 controls from 20  
96 sample collections from East Asia [15].

97

98 GWAS summary statistics of 96 phenotypes from East Asians including diseases, biomarkers  
99 and medication usage were downloaded from GWAS Catalog [20], information of all included  
100 GWAS data from East Asians is summarized in Table S1.

101

102

103 Meta-analysis between depression and SCZ

104

105 Inverse-variance weighted meta-analysis was performed on depression and SCZ using the basic  
106 meta-analysis function in PLINK (v1.90b7) and the fixed-effect meta-analysis p value and fixed-  
107 effect ORs were estimated. We prioritized significant SNPs that reached genome-wide  
108 significance ( $P < 5 \times 10^{-8}$ ) in the meta-analysis and suggestive significance ( $P < 0.01$ ) in the  
109 original single-trait GWAS.

110

111

112 Global genetic correlation analysis

113

114 Genetic correlation  $r_g$  between depression and SCZ was estimated by LD (Linkage  
115 Disequilibrium) score regression (LDSC) using GWAS summary statistic [21]. The LDSC

116 method is described by the following equation:  $E[\beta_j\gamma_j] = \frac{\sqrt{N_1N_2}r_g}{M} l_j + \frac{N_s r}{\sqrt{N_1N_2}}$ , where  $\beta_j$  and  $\gamma_j$   
117 denote the effect size of SNP  $j$  on the two tested traits,  $N_1$  and  $N_2$  are the sample sizes of two  
118 tested traits,  $N_s$  is the number of overlapping samples between two tested traits,  $r$  is the  
119 phenotypic correlation in overlapping samples and  $l_j$  is the LD score. Pre-computed linkage  
120 disequilibrium scores for HapMap3 SNPs calculated based on East-Asian-ancestry data from the  
121 1000 Genomes Project were used in the analysis.

122

123

#### 124 Local genetic correlation analysis

125

126 Considering that genetic correlation estimated by LDSC aggregates information across all  
127 variants in the genome, we further estimated the pairwise local genetic correlation using  $\rho$ -HESS  
128 (heritability estimation from summary statistics) [22].  $\rho$ -HESS are designed to quantify the local  
129 genetic correlation between pairs of traits at each of the 1703 prespecified LD independent  
130 segments with an average length of 1.6 Mb. A Bonferroni corrected p value less than 0.05/1703  
131 was considered as statistically significant.

132

133

#### 134 Multi-trait GWAS analysis

135

136 In addition to the above traditional meta-analysis method, the Multi-Trait Analysis of GWAS  
137 (MTAG) framework, a generalized meta-analysis method that outputs trait-specific SNP  
138 associations [16], was further conducted. MTAG can increase the power to detect loci from  
139 correlated traits by analyzing GWAS summary statistics jointly. It also accounts for sample  
140 overlap and incomplete genetic correlation, when comparing with the conventional inverse-  
141 variance weighted meta-analysis. The first step of MTAG is to filter variants by removing non  
142 common SNPs, duplicated SNPs, or SNPs with strand ambiguity. MTAG then estimates the  
143 pairwise genetic correlation between traits using LDSC [23] and uses these estimates to calibrate  
144 the variance-covariance matrix of the random effect component. MTAG next performs a  
145 random-effect meta-analysis to generate the SNP-level summary statistics. We prioritized

146 significant pleiotropic SNPs that reached genome-wide significance ( $P < 5 \times 10^{-8}$ ) in the multi-  
147 trait analysis and suggestive significance ( $P < 0.01$ ) in the original single-trait GWAS.

148

149

150 Genetic correlation analysis between psychiatric disorders and deep phenotypes

151

152 To investigate the potential risk factors for psychiatric disorders in East Asian populations, we  
153 included 96 GWAS summary statistics of deep phenotypes from the BioBank Japan (BBJ),  
154 including diseases, biomarkers and medication usage. Genetic correlation  $r_g$  between  
155 depression/SCZ and each phenotype was estimated by LD (Linkage Disequilibrium) score  
156 regression (LDSC) using GWAS summary statistic [21].

157

158

159 Multi-trait GWAS analysis of psychiatric disorders and risk factors

160

161 Multi-trait GWAS meta-analysis for psychiatric disorders and the corresponding genetically  
162 correlated deep phenotypes were performed by the MTAG framework. We prioritized significant  
163 pleiotropic SNPs that reached genome-wide significance ( $P < 5 \times 10^{-8}$ ) in the multi-trait analysis  
164 and suggestive significance ( $P < 0.01$ ) in the original single-trait GWAS.

165

166

167 *Results*

168

169 Meta-analysis between depression and schizophrenia

170

171 We conducted a comprehensive meta-analysis by combing summary statistics derived from the  
172 largest GWAS of depression and SCZ within East Asian populations. Our analysis yielded three  
173 pleiotropic loci surpassing the significance threshold of  $P < 5 \times 10^{-8}$ . Among them, 2p16.1  
174 (rs13016665) and 18q23 (rs58736086) loci were previously reported in the study of SCZ among  
175 East Asian populations [15], while none of them was identified in the GWAS of depression  
176 (Table 1, Figure S1). The lead variant rs12031894 of the only novel locus is located in the

177 intergenic region near gene *SOAT1*. It is worth mentioning that this locus reached genome-wide  
178 significance in the meta-analysis of SCZ data including both European and East Asian samples  
179 suggesting its potential relevance and impact in psychiatric disorders across diverse populations  
180 [15]. Additionally, the 1q25.2 locus (rs12031894) was identified as an expression quantitative  
181 trait locus (eQTL) for neighboring genes across multiple tissues (Table S2), particularly in brain  
182 tissues for genes *ABL2*, *FAM20B*, and *TDRD5* (Figure S2).

183

184

185 Genetic correlation between depression and schizophrenia

186

187 To further investigate the shared genetic mechanism between depression and SCZ in East Asian  
188 populations, we estimated the genetic correlation between the two psychiatric disorders using  
189 LDSC. In consistent with findings in European populations [5, 15, 24], we observed a significant  
190 positive genetic correlation between depression and SCZ in East Asian populations ( $r_g = 0.46$ ,  $P$   
191  $= 1.48 \times 10^{-6}$ ). In addition, heritability estimates on the observed scale using GWAS summary  
192 statistics of East Asians were 47.05% for SCZ which is comparable to the estimates calculated  
193 from Europeans. However, in the case of depression, heritability estimates among East Asians  
194 were notably lower at 0.78%, likely attributed to the relatively limited sample size of cases as  
195 compared to European studies.

196

197

198 Multi-trait analysis between depression and schizophrenia

199

200 We next applied MTAG to detect the potential pleiotropic loci shared between depression and  
201 SCZ in East Asians. MTAG differs from conventional meta-analysis in its capacity to enhance  
202 the statistical power of GWAS by incorporating information from effect estimates across  
203 genetically correlated traits, and generate trait-specific associations of each single nucleotide  
204 polymorphism (SNP). In assessing the augmented detection power, we compared the average  $\chi^2$   
205 test statistic for depression or SCZ derived from the multi-trait GWAS with that originating from  
206 the initial GWAS conducted in East Asian populations. The mean  $\chi^2$  statistics for the initial  
207 GWAS results are:  $\chi^2_{\text{GWAS-DEP}} = 1.027$  and  $\chi^2_{\text{GWAS-SCZ}} = 1.265$  and the mean  $\chi^2$  statistics for the



208 MTAG-GWAS results are:  $\chi^2_{\text{MTAG-DEP}} = 1.052$  and  $\chi^2_{\text{MTAG-SCZ}} = 1.267$ . We observed varying  
209 degrees of increase in the effective sample size for both depression and SCZ. Specifically, the  
210 effective sample size for SCZ (MTAG-SCZ) increased slightly from 58,140 to 58,759, while the  
211 effective sample size for depression (MTAG-DEP) experienced a substantial estimated increase  
212 of 94.61%, expanding from 194,548 to 378,607. In alignment with the conventional meta-  
213 analysis conducted using PLINK, the newly identified signal at 1q25.2 was observed in both the  
214 results of the MTAG-DEP and MTAG-SCZ analyses (Table S3, Figure S1). We also detected  
215 two additional loci at 2q33.1 (rs17590956) and 18q23(rs28735056), which were previously  
216 reported in East Asians (Table S3, Figure S1).

217

218

219 Genetic correlations between psychiatric disorders and deep phenotypes

220

221 To further elucidate the genetic correlations between psychiatric disorders and potential risk  
222 factors in East Asians, we analyzed GWAS data of 96 phenotypes sourced from BBJ, ranging  
223 from diseases, biomarkers and medication usage. Our analysis uncovered significant positive  
224 genetic correlations between depression and obesity-related traits. This encompassed variables  
225 like weight ( $r_g = 0.16$ ,  $P = 0.009$ ), body mass index (BMI,  $r_g = 0.24$ ,  $P = 8.0 \times 10^{-4}$ ), type 2  
226 diabetes (T2D,  $r_g = 0.24$ ,  $P = 0.003$ ), and the use of medications associated with diabetes ( $r_g =$   
227  $0.19$ ,  $P = 0.022$ ). Besides, serum alkaline phosphatase levels also exhibited a significant positive  
228 genetic correlation with depression. Conversely, our analysis unveiled significant negative  
229 genetic correlations between depression and two blood biomarkers: high-density lipoprotein  
230 (HDL) cholesterol and total bilirubin levels (Table S4, Figure 1A). Likewise, we detected  
231 significant negative correlations between SCZ and certain blood lipid markers, particularly HDL  
232 ( $r_g = -0.13$ ,  $P = 0.006$ ) and total cholesterol levels (TCL,  $r_g = -0.12$ ,  $P = 0.018$ ). In addition,  
233 significant negative genetic correlations were also detected between SCZ and chronic diseases  
234 including Chronic hepatitis C infection and Chronic sinusitis. In contrast, SCZ was significantly  
235 correlated with heart diseases such as angina pectoris. We also found significant genetic  
236 correlations between SCZ and the use of various medications, including those for peptic ulcer  
237 and gastro-esophageal reflux disease (GORD) ( $r_g = 0.34$ ,  $P = 0.003$ ), non-steroidal anti-  
238 inflammatory and antirheumatic products ( $r_g = 0.29$ ,  $P = 0.012$ ), among others (Table S4, Figure

239 1B).

240

241

242 Local genetic correlations between psychiatric disorders and corresponding risk factors

243

244 We next conducted a genome-wide scan to identify specific genomic regions that contribute to  
245 the shared heritability of genetically correlated traits. Despite the absence of statistically  
246 significant regions following Bonferroni correction, we observed that 12q23-q24 ( $P_{local} = 0.0019$ )  
247 and 16q21 ( $P_{local} = 0.0024$ ) displayed suggestive correlations between depression and HDL  
248 (Figure S3A). Additionally, 12q23 ( $P_{local} = 0.0012$ ) exhibited a suggestive correlation between  
249 SCZ and HDL (Figure S3B).

250

251

252 Multi-trait analysis of psychiatric disorders and corresponding risk factors

253

254 The insights garnered from our genetic correlation analysis served as a catalyst for a more in-  
255 depth exploration, aiming to pinpoint shared pleiotropic genetic loci that influence both  
256 psychiatric disorders and associated risk factors. Here, we conducted MTAG analyses for each  
257 genetically correlated trait pair, and prioritized SNPs that reached genome-wide significance ( $P$   
258  $< 5 \times 10^{-8}$ ). We identified two significant signals in the analysis of depression and BMI, neither of  
259 which had been previously reported in GWAS studies of depression within East Asian  
260 populations. Among them, locus at 19q13.32 near *GIPR* was also detected in the analysis of  
261 depression and weight. The lead SNP rs4802269 serves as an eQTL for the nearby gene *EML2* in  
262 tissues from cerebellar hemispheres. Furthermore, it functions as an eQTL for the nearby genes  
263 *DMPK*, *DMWD*, and *GIPR* in adipose tissues (Table S2), implying the potential relevance of this  
264 locus in regulating factors associated with both depression and weight. Additionally, in our  
265 exploration of the connection between depression and type 2 diabetes (T2D), we uncovered three  
266 shared loci, none of which had been previously identified in studies of depression within East  
267 Asian populations. Among these, the variant rs10974438 at 9p24.2, located within an intronic  
268 region of *GLIS3*, has been linked to mania, hypomania, bipolar disorder, or manic-depression in  
269 an analysis of UK Biobank data (UKB Neale v2, Table S5). Furthermore, rs11074451 at 16p12.3

270 serves as a splicing quantitative trait locus (sQTL,  $P = 1 \times 10^{-9}$ ) for the nearby gene *GP2* in the  
271 pancreas according to GTEx, suggesting its potential role in the interplay between depression  
272 and T2D. In addition to the above three loci, a novel locus at 18p11.22 was identified when  
273 analyzing depression and the measurement of diabetes medication usage. Besides, we identified  
274 two novel loci at 12q24.12 (rs11066015) and 16q12.2 (rs35626903) during the analysis of  
275 depression and HDL. The locus at 12q24.12 (rs11066015) is specific to East Asian populations  
276 and encompasses the pivotal *ALDH2* gene, which has been implicated in various metabolic  
277 quantitative traits. The rs35626903 variant, located at 16q12.2 within the intron of the *AMFR*  
278 gene, has been previously related to psychological or psychiatric problem in the study of  
279 Europeans [25]. We also identified two novel pleiotropic signals between depression and total  
280 bilirubin levels (Table 2, Figure S4).

281  
282 We next conducted a MTAG analysis to uncover pleiotropic variants impacting both SCZ and  
283 corresponding risk factors. We identified a total of seven significant loci shared between SCZ  
284 and HDL including six located in loci reported in SCZ GWAS in East Asian populations. The  
285 novel locus at 5q31.3 was also identified in the analysis between SCZ and TCL, as well as the  
286 analysis between SCZ and stable angina pectoris (Table 3, Figure S5). Notably, this locus is sited  
287 close to the protocadherin gamma gene cluster, which may play a critical role in the  
288 establishment and function of specific cell-cell connections in the brain. Particularly, the lead  
289 SNP rs11956411 is an eQTL of *PCDHGA3* in brain cortex (Table S2). Additionally, we detected  
290 four significant loci shared between SCZ and chronic diseases (Chronic hepatitis C infection and  
291 Chronic sinusitis), but all of them were reported in GWAS of SCZ conducted on East Asians  
292 (Table S6, Figure S7-S8). In the analysis of SCZ and the use of medications, we uncovered three  
293 novel loci at 1q25.2 (rs61824368), 4q13.1 (rs62297721), and 8p21.2 (rs117325001) (Table 3,  
294 Figure S5). The 1q25.2 and 8p21.2 loci had been reported in the meta-analysis of SCZ, including  
295 both European and East Asian populations [15].

296  
297

## 298 *Discussion*

299

300 To the best of our current understanding, this is the first genome-wide multi-trait analysis  
301 investigating genetic correlations, pleiotropic loci and shared genetic mechanisms of depression  
302 and SCZ within East Asian populations. Leveraging the known genetic correlation between these  
303 two psychiatric disorders, we pinpointed a novel locus via the inverse-variance weighted meta-  
304 analysis, and further validated this finding using MTAG. To explore the potential risk factors for  
305 psychiatric disorders among East Asian populations, we conducted an in-depth examination of  
306 96 distinct phenotypes from BBJ. This extensive exploration yielded the identification of several  
307 previously unreported risk loci for SCZ and depression, shedding new light on the distinctive  
308 genetic underpinnings of these psychiatric disorders within the East Asian populations.

309

310 In previous research efforts conducted by the Psychiatric Genomics Consortium (PGC),  
311 conventional meta-analysis techniques were utilized to detect pleiotropic loci associated with  
312 psychiatric disorders, with a primary focus on European populations [6, 26]. However, recent  
313 progress in GWAS focused on SCZ and depression has led to a substantial increase in data  
314 concerning East Asian populations, which motivated us to initiate research endeavors focused  
315 exclusively on East Asian populations. Our meta-analysis of depression and SCZ identified a  
316 novel locus at 1q25.2 shared between depression and SCZ in East Asians. The lead single  
317 nucleotide polymorphism (SNP), rs12031894, has been identified as an eQTL influencing the  
318 activity of multiple nearby genes across various tissues. Notably, in a majority of brain tissues,  
319 rs12031894 functions as an eQTL for *ABL2*. *ABL2* encodes a member of the Abelson family of  
320 nonreceptor tyrosine protein kinases, which play pivotal roles in processes such as neurulation  
321 and neurite outgrowth. These kinases act as intermediaries, transmitting signals from axon  
322 guidance cues and growth factor receptors to facilitate cytoskeletal rearrangements. In mature  
323 neurons, Abl kinases are situated in both pre- and postsynaptic compartments, contributing to the  
324 regulation of synaptic stability and plasticity. Given that this locus exhibits an association with  
325 SCZ in European populations as well (Figure 2A), it suggests that the candidate gene *ABL2*  
326 could exerts a widespread influence on SCZ, affecting both East Asians and Europeans. In  
327 contrast, the evidence from regional plot (Figure 2B) suggests that this locus might be  
328 exclusively linked to depression in East Asians but not in Europeans, implying the existence of a  
329 complex regulatory mechanism influencing depression across different populations. We then  
330 utilized MTAG to identify shared pleiotropic loci between depression and SCZ in East Asians.

331 MTAG enhances GWAS statistical power by integrating effect estimates from genetically related  
332 traits to derive trait-specific SNP associations, distinguishing it from conventional meta-analysis.  
333 As expected, the aforementioned 1q25.2 locus appeared in both MTAG-DEP and MTAG-SCZ  
334 results, demonstrating the reliability of this novel method.

335

336 In addition to correlations among psychiatric disorders [27], LDSC analysis has consistently  
337 reported genetic correlations between psychiatric disorders and other diseases or risk factors in  
338 European populations [28, 29]. Therefore, we extended our investigations to East Asian  
339 populations by analyzing GWAS data encompassing 96 phenotypes from the BBJ dataset. Our  
340 analysis revealed positive genetic correlations between depression and obesity-related traits, such  
341 as weight, BMI, T2D, and diabetes medication usage. This aligns with findings from various  
342 epidemiological studies [30-33]. Intriguingly, serum alkaline phosphatase levels also displayed a  
343 positive genetic correlation with depression. This is consistent with the observations of Li et al.,  
344 who reported higher alkaline phosphatase levels in individuals with depression compared to a  
345 control group in their analysis of National Health and Nutrition Examination Survey (NHANES)  
346 data [34]. Furthermore, recent research on U.S. adults has indicated a significant association  
347 between higher alkaline phosphatase levels and an increased risk of depression [35]. Conversely,  
348 we identified negative genetic correlations between depression and two blood biomarkers: HDL  
349 and bilirubin. Low levels of HDL have been extensively studied in connection with depression in  
350 multiple research studies [36-38]. Notably, Liang et al. reported that low HDL levels may be  
351 linked to more severe depressive symptoms in East Asian populations [39]. Additionally, lower  
352 HDL levels have been associated with SCZ and psychosis in various studies [40-42]. Consistent  
353 with this, we observed negative genetic correlations between HDL and SCZ. In contrast, positive  
354 genetic correlations were noted with heart diseases such as angina pectoris, which is in line with  
355 the observation that cardiovascular diseases are prevalent among individuals with SCZ [43-45].  
356 These genetic correlations provide valuable insights into the intricate interplay among depression,  
357 SCZ, metabolic factors, and various health conditions in East Asian populations, guiding further  
358 research and facilitating the identification of shared pleiotropic loci influencing both psychiatric  
359 disorders and related risk factors.

360

361 We next performed MTAG analysis on depression, SCZ, and their associated traits in East Asian  
362 populations. We uncovered ten novel pleiotropic loci for depression through MTAG analysis.  
363 These loci demonstrated connections with traits such as BMI, weight, HDL, TBL, T2D, and  
364 diabetes medications. Seven of these loci exhibited evidence of association with psychiatric traits  
365 in Europeans, including four acting as eQTLs, implying their potential regulatory role in gene  
366 expression. For instance, the lead SNP rs4802269 of the 19q13.32 locus served as an eQTL for  
367 the nearby gene *EML2* in cerebellar hemispheres and for genes *DMPK*, *DMWD*, and *GIPR* in  
368 adipose tissues, hinting at its role in depression and weight regulation. Additionally, 18p11.22  
369 was identified in the analysis of depression and diabetes medication usage. This locus is near the  
370 *MTCLI* gene, which plays a vital role in maintaining Purkinje neuron axon initial segments [46].  
371 Furthermore, among the remaining genetic loci, the 12q24.12 locus is specifically presented in  
372 East Asian populations. Notably, the lead variant rs11066015 within this region exhibits a high  
373 level of LD with a missense variant of gene *ALDH2* (rs671,  $R^2 = 0.95$ ). Our analysis reveals that  
374 the MTAG P-value for rs671 ( $P = 4.46 \times 10^{-20}$ ) is slightly greater than that of rs11066015 ( $P =$   
375  $8.23 \times 10^{-21}$ ), suggesting that the 12q24.12 locus is likely influenced by rs671 in East Asians. This  
376 is of particular interest because the rs671 variant leads to a loss of ALDH2 enzymatic activity,  
377 resulting in adverse reactions to acetaldehyde, which effectively reduce alcohol consumption  
378 [47].

379  
380 In the investigation of SCZ and its related traits, we uncovered four new genetic loci, one of  
381 which was the previously mentioned 1q25.2 locus, shared between depression and SCZ. Notably,  
382 the 5q31.3 locus emerged consistently in the analysis of SCZ and its associated traits, which  
383 included HDL, TCL, and Stable angina pectoris. This locus is situated in close proximity to the  
384 protocadherin gamma gene cluster, which plays a potentially vital role in establishing and  
385 maintaining specific cell-cell connections in the brain. Particularly, the lead SNP rs11956411  
386 acts as an eQTL for *PCDHGA3* in the brain cortex. Moreover, the 4q13.1 locus is located around  
387 the *EPHA5* gene, known for its crucial involvement in brain development and synaptic plasticity.  
388 This locus may also be linked to brain disorders such as bipolar [48] and Dravet syndrome [49].  
389 Similar to the previously mentioned 1q25.2 locus, the 8p21.2 locus centered around the *BNIP3L*  
390 gene surpassed genome-wide significance in the meta-analysis of SCZ GWAS from both  
391 European and East Asian populations. Further investigation of both common and rare genetic

392 variants indicated that *BNIP3L* might serve as a susceptibility gene [50]. However, it's important  
393 to note that eQTL data from GTEx suggests that genotypes of the lead SNP rs117325001 are  
394 significantly associated with the expression level of *SDADIP1* in multiple brain tissues,  
395 implying a potential role of *SDADIP1* in SCZ.

396

397 This study has limitations. Firstly, due to the constraints of available data within the East Asian  
398 population, our analysis was limited to depression and SCZ. As more comprehensive datasets  
399 become accessible, we will have the opportunity to explore and analyze a broader spectrum of  
400 psychiatric disorders in East Asians, including but not limited to ADHD, Autism, and Anorexia,  
401 which will contribute to a more comprehensive understanding of genetic correlations across  
402 various mental health conditions. Secondly, it's important to acknowledge that the eQTL data  
403 utilized in this study primarily stem from non-East Asian populations, predominantly Europeans.  
404 As a result, the potential cis-eQTL effects observed should ideally be subjected to further  
405 validation within East Asian populations once such data becomes available. This verification  
406 process will enhance the reliability and generalizability of our findings, ensuring that they are  
407 representative of the genetic landscape in East Asian individuals.

408

409 In conclusion, our study advances our understanding of the genetic mechanisms of depression  
410 and SCZ within East Asian populations by introducing 14 previously undiscovered pleiotropic  
411 risk loci to the existing pool of genetic contributors to psychiatric disorders. It is evident from  
412 this study that additional genetic loci associated with psychiatric disorders in East Asian  
413 populations can be identified through standard GWAS or MTAG analysis with larger sample  
414 sizes. This study warrants further investigation to explore the genetic intricacies of mental health  
415 conditions within this specific population.

416

417

#### 418 *Conflict of interest*

419

420 The authors report no biomedical financial interests or potential conflicts of interest.

421

422

423

424 *Acknowledgements*

425

426 This work is supported by the Special Funds of Taishan Scholar Project, China (tsqn202211224),

427 All authors report no biomedical financial interests or potential conflicts of interest.



428 *Tables*

429

430

431 **Table 1. Meta-analysis between depression and schizophrenia in East Asians using PLINK.**

432

| SNP        | CHR | BP        | A1 | A2 | Depression |                 | Schizophrenia |                 | Meta  |                 | Genes   | Annotation |
|------------|-----|-----------|----|----|------------|-----------------|---------------|-----------------|-------|-----------------|---------|------------|
|            |     |           |    |    | OR         | <i>P</i> -value | OR            | <i>P</i> -value | OR    | <i>P</i> -value |         |            |
| rs12031894 | 1   | 179270314 | T  | C  | 0.948      | 0.001           | 0.928         | 1.24E-07        | 0.937 | 8.09E-10        | SOAT1   | new        |
| rs13016665 | 2   | 57995348  | A  | C  | 1.058      | 4.11E-04        | 1.077         | 3.25E-06        | 1.067 | 7.03E-09        | VRK2    | known      |
| rs58736086 | 18  | 77645575  | T  | C  | 1.066      | 0.003           | 1.097         | 2.30E-07        | 1.084 | 1.28E-08        | SLC66A2 | known      |

433

434

435  
436  
437

**Table 2. Multi-trait meta-analysis between depression and risk factors in East Asians.**

| Risk factors                           | SNP        | CHR | BP        | A1 | A2 | Trait1 |          | Trait2 |           | MTAG   |          | Genes                   | Annotation |
|----------------------------------------|------------|-----|-----------|----|----|--------|----------|--------|-----------|--------|----------|-------------------------|------------|
|                                        |            |     |           |    |    | beta   | P-value  | beta   | P-value   | beta   | P-value  |                         |            |
| BMI                                    | rs13029479 | 2   | 655222    | A  | G  | 0.101  | 0.007    | -0.052 | 5.40E-17  | 0.035  | 1.31E-09 | TMEM18                  | new        |
|                                        | rs4802269  | 19  | 46167469  | G  | A  | -0.07  | 4.94E-04 | 0.042  | 4.60E-16  | -0.021 | 5.01E-11 | GIPR                    | new        |
| Weight                                 | rs4802269  | 19  | 46167469  | G  | A  | -0.07  | 4.94E-04 | 0.037  | 4.30E-17  | -0.021 | 1.25E-08 | GIPR                    | new        |
| HDL                                    | rs11066015 | 12  | 112168009 | A  | G  | -0.073 | 0.001    | -0.122 | 1.60E-109 | -0.033 | 8.23E-21 | ALDH2                   | new        |
|                                        | rs35626903 | 16  | 56431613  | G  | A  | -0.071 | 6.24E-06 | -0.028 | 2.50E-09  | -0.018 | 2.52E-09 | AMFR                    | new        |
| TBL                                    | rs12993249 | 2   | 234479377 | A  | G  | -0.055 | 1.40E-03 | -0.123 | 1.60E-208 | -0.044 | 2.55E-46 | USP40                   | new        |
|                                        | rs10770745 | 12  | 20986617  | T  | G  | -0.067 | 8.73E-04 | -0.031 | 2.60E-13  | -0.018 | 9.50E-09 | SLCO1B3<br>-<br>SLCO1B7 | new        |
|                                        | rs11066015 | 12  | 112168009 | A  | G  | -0.073 | 1.47E-03 | -0.035 | 1.30E-15  | -0.02  | 4.66E-09 | ALDH2                   | new        |
| Type 2 diabetes                        | rs10013800 | 4   | 71731236  | T  | C  | -0.092 | 4.21E-05 | 0.081  | 2.21E-10  | -0.023 | 1.19E-11 | GRSF1                   | new        |
|                                        | rs10974438 | 9   | 4291928   | A  | C  | 0.045  | 0.005    | 0.078  | 2.35E-16  | 0.017  | 4.95E-12 | GLIS3                   | new        |
|                                        | rs11074451 | 16  | 20336257  | A  | G  | 0.1    | 2.27E-04 | 0.103  | 9.12E-11  | 0.026  | 5.61E-11 | GP2                     | new        |
| Drugs used in diabetes use measurement | rs6850072  | 4   | 71725868  | A  | G  | 0.074  | 2.37E-04 | -0.086 | 1.14E-12  | 0.022  | 1.25E-11 | GRSF1                   | new        |
|                                        | rs10974438 | 9   | 4291928   | A  | C  | 0.045  | 0.005    | 0.072  | 1.91E-12  | 0.016  | 1.64E-09 | GLIS3                   | new        |
|                                        | rs11074451 | 16  | 20336257  | A  | G  | 0.1    | 2.27E-04 | 0.114  | 2.00E-11  | 0.028  | 5.46E-11 | GP2                     | new        |
|                                        | rs662872   | 18  | 8881068   | T  | C  | -0.084 | 1.80E-06 | 0.038  | 7.27E-04  | -0.016 | 2.02E-08 | MTCL1                   | new        |

438

439 Trait1: depression

440 Trait2: risk factors

441

442 **Table 3. Novel loci in the multi-trait meta-analysis between schizophrenia and risk factors in East Asians.**

443

| Risk factors                                          | SNP         | CHR | BP        | A1 | A2 | Trait1 |          | Trait2 |          | MTAG   |          | Genes   | Annotation |
|-------------------------------------------------------|-------------|-----|-----------|----|----|--------|----------|--------|----------|--------|----------|---------|------------|
|                                                       |             |     |           |    |    | beta   | P-value  | beta   | P-value  | beta   | P-value  |         |            |
| HDL                                                   | rs11956411  | 5   | 140853856 | C  | T  | -0.097 | 1.08E-07 | -0.02  | 1.40E-03 | -0.035 | 2.77E-08 | PCDHGC3 | new        |
| TCL                                                   | rs11956411  | 5   | 140853856 | T  | C  | 0.097  | 1.08E-07 | 0.005  | 1.00E-03 | 0.036  | 1.54E-08 | PCDHGC3 | new        |
| Stable angina pectoris                                | rs2237079   | 5   | 140877905 | A  | G  | -0.085 | 1.24E-07 | 0.013  | 1.94E-03 | -0.033 | 4.65E-08 | PCDHGC3 | new        |
| Antihypertensive use measurement                      | rs62297721  | 4   | 66504803  | A  | G  | 0.074  | 6.44E-08 | 0.019  | 4.81E-03 | 0.033  | 1.78E-08 | EPHA5   | new        |
| Antithrombotic agent use measurement                  | rs117325001 | 8   | 26242272  | T  | G  | 0.074  | 6.62E-08 | 0.008  | 8.98E-03 | 0.033  | 2.49E-08 | BNIP3L  | new        |
| aspirin use measurement                               | rs117325001 | 8   | 26242272  | T  | G  | 0.074  | 6.62E-08 | 0.008  | 9.52E-04 | 0.033  | 2.44E-08 | BNIP3L  | new        |
| Vasodilators used in cardiac diseases use measurement | rs61824368  | 1   | 179298809 | T  | C  | -0.075 | 1.19E-07 | 0.013  | 2.51E-03 | -0.033 | 3.26E-08 | SOAT1   | new        |

444

445 Trait1: depression

446 Trait2: risk factors

447 *Figures*

448  
449

450 **Figure 1. Genetic correlation network between psychiatric disorders and risk factors.**

451 (A) genetic correlation network of depression. (B) genetic correlation network of SCZ.

452 Genetically correlated traits and diseases are clustered close together. Each circle represents a  
453 trait, and each edge represents a significant genetic correlation ( $P < 0.05$ ). Positive and  
454 negative genetic correlations are indicated by color according to the key. SCZ, SCZ; SAP  
455 (biomarker), serum alkaline phosphatase levels; TBL, total bilirubin levels; T2D, Type 2  
456 diabetes; DD, Drugs used in diabetes use measurement; TCL, total cholesterol levels; AP, angina  
457 pectoris; CHC, chronic hepatitis C infection Chronic sinusitis; SAP (disease), stable angina  
458 pectoris; AARS, agents acting on the renin-angiotensin system use measurement; NSIA, Non-  
459 steroidal anti-inflammatory and antirheumatic product use measurement; AnUM,  
460 Antihypertensive use measurement; AAUM, Antithrombotic agent use measurement; BBAU,  
461 Beta blocking agent use measurement; CCBU, Calcium channel blocker use measurement;  
462 PUGRD, Peptic ulcer and gastro-oesophageal reflux disease (GORD) drug use measurement;  
463 HCRI, HMG CoA reductase inhibitor use measurement; Asum, Aspirin use measurement;  
464 VUCD, Vasodilators used in cardiac diseases use measurement.

465  
466

467 **Figure 2. Co-localization for psychiatric disorders in East Asians and Europeans at 1q25.2.**

468 Left panel showed the merged association plot for psychiatric disorder in East Asians and  
469 Europeans, and right panel showed the regional plots for East Asians and Europeans respectively.  
470 Panel A shows the regional plots for SCZ and points are colored by LD with respect to  
471 rs12031894, which is labeled with a purple diamond. Panel B shows the regional plots for  
472 depression and points are colored by LD with respect to rs12031894, which is labeled with a  
473 purple diamond.

474

475 *References*

476 1. Cieza, A., et al., *Global estimates of the need for rehabilitation based on the Global*  
477 *Burden of Disease study 2019: a systematic analysis for the Global Burden of Disease*  
478 *Study 2019*. Lancet, 2021. **396**(10267): p. 2006-2017.

479 2. Plomin, R., M.J. Owen, and P. McGuffin, *The genetic basis of complex human behaviors*.  
480 Science, 1994. **264**(5166): p. 1733-9.

481 3. Polderman, T.J., et al., *Meta-analysis of the heritability of human traits based on fifty*  
482 *years of twin studies*. Nat Genet, 2015. **47**(7): p. 702-9.

483 4. Smoller, J.W., et al., *Psychiatric genetics and the structure of psychopathology*. Mol  
484 Psychiatry, 2019. **24**(3): p. 409-420.

485 5. Anttila, V., et al., *Analysis of shared heritability in common disorders of the brain*.  
486 Science, 2018. **360**(6395).

487 6. *Genomic Relationships, Novel Loci, and Pleiotropic Mechanisms across Eight Psychiatric*  
488 *Disorders*. Cell, 2019. **179**(7): p. 1469-1482.e11.

489 7. Sullivan, P.F., M.C. Neale, and K.S. Kendler, *Genetic epidemiology of major depression:*  
490 *review and meta-analysis*. Am J Psychiatry, 2000. **157**(10): p. 1552-62.

491 8. Lichtenstein, P., et al., *Common genetic determinants of schizophrenia and bipolar*  
492 *disorder in Swedish families: a population-based study*. Lancet, 2009. **373**(9659): p. 234-  
493 9.

494 9. Sullivan, P.F., K.S. Kendler, and M.C. Neale, *Schizophrenia as a complex trait: evidence*  
495 *from a meta-analysis of twin studies*. Arch Gen Psychiatry, 2003. **60**(12): p. 1187-92.

496 10. Owen, M.J., A. Sawa, and P.B. Mortensen, *Schizophrenia*. Lancet, 2016. **388**(10039): p.  
497 86-97.

498 11. Sullivan, P.F., et al., *Psychiatric Genomics: An Update and an Agenda*. Am J Psychiatry,  
499 2018. **175**(1): p. 15-27.

500 12. Als, T.D., et al., *Depression pathophysiology, risk prediction of recurrence and comorbid*  
501 *psychiatric disorders using genome-wide analyses*. Nat Med, 2023. **29**(7): p. 1832-1844.

502 13. Trubetskov, V., et al., *Mapping genomic loci implicates genes and synaptic biology in*  
503 *schizophrenia*. Nature, 2022. **604**(7906): p. 502-508.

504 14. Giannakopoulou, O., et al., *The Genetic Architecture of Depression in Individuals of East*  
505 *Asian Ancestry: A Genome-Wide Association Study*. JAMA Psychiatry, 2021. **78**(11): p.  
506 1258-1269.

507 15. Lam, M., et al., *Comparative genetic architectures of schizophrenia in East Asian and*  
508 *European populations*. Nat Genet, 2019. **51**(12): p. 1670-1678.

509 16. Turley, P., et al., *Multi-trait analysis of genome-wide association summary statistics*  
510 *using MTAG*. Nat Genet, 2018. **50**(2): p. 229-237.

511 17. Gong, W., et al., *Role of the Gut-Brain Axis in the Shared Genetic Etiology Between*  
512 *Gastrointestinal Tract Diseases and Psychiatric Disorders: A Genome-Wide Pleiotropic*  
513 *Analysis*. JAMA Psychiatry, 2023. **80**(4): p. 360-370.

514 18. Sakaue, S., et al., *A cross-population atlas of genetic associations for 220 human*  
515 *phenotypes*. Nat Genet, 2021. **53**(10): p. 1415-1424.

- 516 19. *Sparse whole-genome sequencing identifies two loci for major depressive disorder.*  
517 Nature, 2015. **523**(7562): p. 588-91.
- 518 20. Buniello, A., et al., *The NHGRI-EBI GWAS Catalog of published genome-wide association*  
519 *studies, targeted arrays and summary statistics 2019.* Nucleic Acids Res, 2019. **47**(D1): p.  
520 D1005-d1012.
- 521 21. Bulik-Sullivan, B.K., et al., *LD Score regression distinguishes confounding from*  
522 *polygenicity in genome-wide association studies.* Nat Genet, 2015. **47**(3): p. 291-5.
- 523 22. Shi, H., et al., *Local Genetic Correlation Gives Insights into the Shared Genetic*  
524 *Architecture of Complex Traits.* Am J Hum Genet, 2017. **101**(5): p. 737-751.
- 525 23. Bulik-Sullivan, B., et al., *An atlas of genetic correlations across human diseases and*  
526 *traits.* Nat Genet, 2015. **47**(11): p. 1236-41.
- 527 24. Lee, S.H., et al., *Genetic relationship between five psychiatric disorders estimated from*  
528 *genome-wide SNPs.* Nat Genet, 2013. **45**(9): p. 984-94.
- 529 25. Dönertaş, H.M., et al., *Common genetic associations between age-related diseases.* Nat  
530 Aging, 2021. **1**(4): p. 400-412.
- 531 26. *Identification of risk loci with shared effects on five major psychiatric disorders: a*  
532 *genome-wide analysis.* Lancet, 2013. **381**(9875): p. 1371-1379.
- 533 27. Romero, C., et al., *Exploring the genetic overlap between twelve psychiatric disorders.*  
534 Nat Genet, 2022. **54**(12): p. 1795-1802.
- 535 28. Pouget, J.G., et al., *Cross-disorder analysis of schizophrenia and 19 immune-mediated*  
536 *diseases identifies shared genetic risk.* Hum Mol Genet, 2019. **28**(20): p. 3498-3513.
- 537 29. Cheng, S., et al., *An atlas of genetic correlations between psychiatric disorders and*  
538 *human blood plasma proteome.* Eur Psychiatry, 2020. **63**(1): p. e17.
- 539 30. Jung, S.J., et al., *Association between body size, weight change and depression:*  
540 *systematic review and meta-analysis.* Br J Psychiatry, 2017. **211**(1): p. 14-21.
- 541 31. Quek, Y.H., et al., *Exploring the association between childhood and adolescent obesity*  
542 *and depression: a meta-analysis.* Obes Rev, 2017. **18**(7): p. 742-754.
- 543 32. Mannan, M., et al., *Is there a bi-directional relationship between depression and obesity*  
544 *among adult men and women? Systematic review and bias-adjusted meta analysis.*  
545 Asian J Psychiatr, 2016. **21**: p. 51-66.
- 546 33. Fulton, S., et al., *The menace of obesity to depression and anxiety prevalence.* Trends  
547 Endocrinol Metab, 2022. **33**(1): p. 18-35.
- 548 34. Li, X., et al., *Relationship between depressive disorders and biochemical indicators in*  
549 *adult men and women.* BMC Psychiatry, 2023. **23**(1): p. 49.
- 550 35. Liang, Y., et al., *Association of serum alkaline phosphatase and depression in US adults: a*  
551 *population-based cross-sectional study.* Front Psychiatry, 2023. **14**: p. 1131105.
- 552 36. Lehto, S.M., et al., *Low HDL cholesterol associates with major depression in a sample*  
553 *with a 7-year history of depressive symptoms.* Prog Neuropsychopharmacol Biol  
554 Psychiatry, 2008. **32**(6): p. 1557-61.
- 555 37. Melin, E.O., et al., *Lower HDL-cholesterol, a known marker of cardiovascular risk, was*  
556 *associated with depression in type 1 diabetes: a cross sectional study.* Lipids Health Dis,  
557 2019. **18**(1): p. 65.

- 558 38. Ramachandran Pillai, R., et al., *Low serum levels of High-Density Lipoprotein cholesterol*  
559 *(HDL-c) as an indicator for the development of severe postpartum depressive symptoms.*  
560 *PLoS One*, 2018. **13**(2): p. e0192811.
- 561 39. Liang, Y., et al., *Association between lipid profile and depressive symptoms among*  
562 *Chinese older people: mediation by cardiovascular diseases?* *Int J Behav Med*, 2014.  
563 **21**(4): p. 590-6.
- 564 40. Herceg, D., et al., *Aggression in Women with Schizophrenia Is Associated with Lower HDL*  
565 *Cholesterol Levels.* *Int J Mol Sci*, 2022. **23**(19).
- 566 41. Gjerde, P.B., et al., *Increase in serum HDL level is associated with less negative*  
567 *symptoms after one year of antipsychotic treatment in first-episode psychosis.* *Schizophr*  
568 *Res*, 2018. **197**: p. 253-260.
- 569 42. Anjum, S., et al., *Metabolic syndrome in drug naïve schizophrenic patients.* *Diabetes*  
570 *Metab Syndr*, 2018. **12**(2): p. 135-140.
- 571 43. Cohen, H., et al., *Association of autonomic dysfunction and clozapine. Heart rate*  
572 *variability and risk for sudden death in patients with schizophrenia on long-term*  
573 *psychotropic medication.* *Br J Psychiatry*, 2001. **179**: p. 167-71.
- 574 44. Mitchell, A.J., et al., *Is the prevalence of metabolic syndrome and metabolic*  
575 *abnormalities increased in early schizophrenia? A comparative meta-analysis of first*  
576 *episode, untreated and treated patients.* *Schizophr Bull*, 2013. **39**(2): p. 295-305.
- 577 45. Veeneman, R.R., et al., *Exploring the Relationship Between Schizophrenia and*  
578 *Cardiovascular Disease: A Genetic Correlation and Multivariable Mendelian*  
579 *Randomization Study.* *Schizophr Bull*, 2022. **48**(2): p. 463-473.
- 580 46. Satake, T., et al., *MTCL1 plays an essential role in maintaining Purkinje neuron axon*  
581 *initial segment.* *Embo j*, 2017. **36**(9): p. 1227-1242.
- 582 47. Chen, C.H., et al., *Targeting aldehyde dehydrogenase 2: new therapeutic opportunities.*  
583 *Physiol Rev*, 2014. **94**(1): p. 1-34.
- 584 48. Noor, A., et al., *Copy number variant study of bipolar disorder in Canadian and UK*  
585 *populations implicates synaptic genes.* *Am J Med Genet B Neuropsychiatr Genet*, 2014.  
586 **165b**(4): p. 303-13.
- 587 49. Lin, W.D., et al., *Molecular aspects of Dravet syndrome patients in Taiwan.* *Clin Chim*  
588 *Acta*, 2013. **421**: p. 34-40.
- 589 50. Zhou, J., et al., *Identification of rare and common variants in BNIP3L: a schizophrenia*  
590 *susceptibility gene.* *Hum Genomics*, 2020. **14**(1): p. 16.
- 591

A

Quantitative trait categories and diseases

- Psychiatric disorder
- Disease
- Biomarker
- Medication usage
- Anthropometric trait

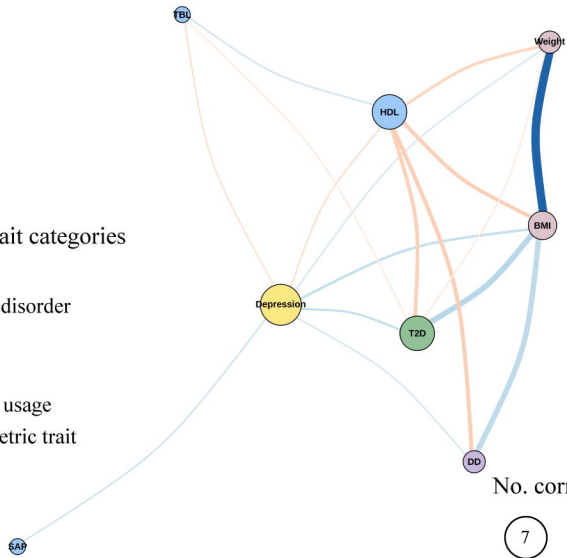

B

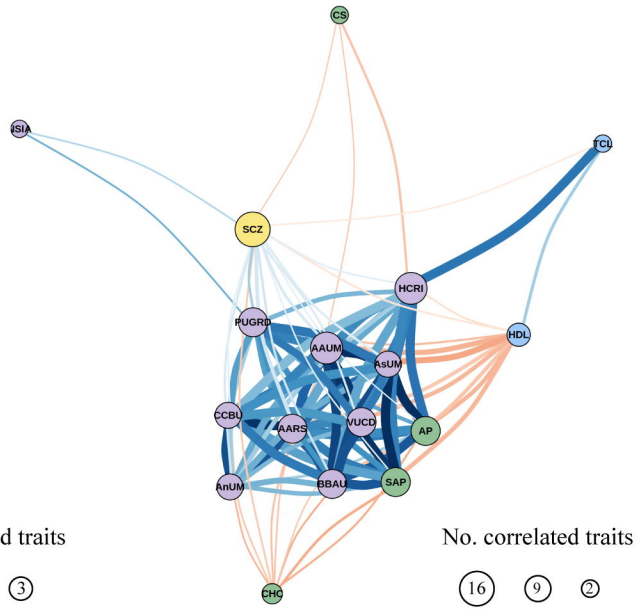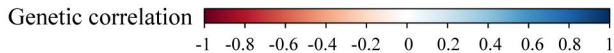



**A**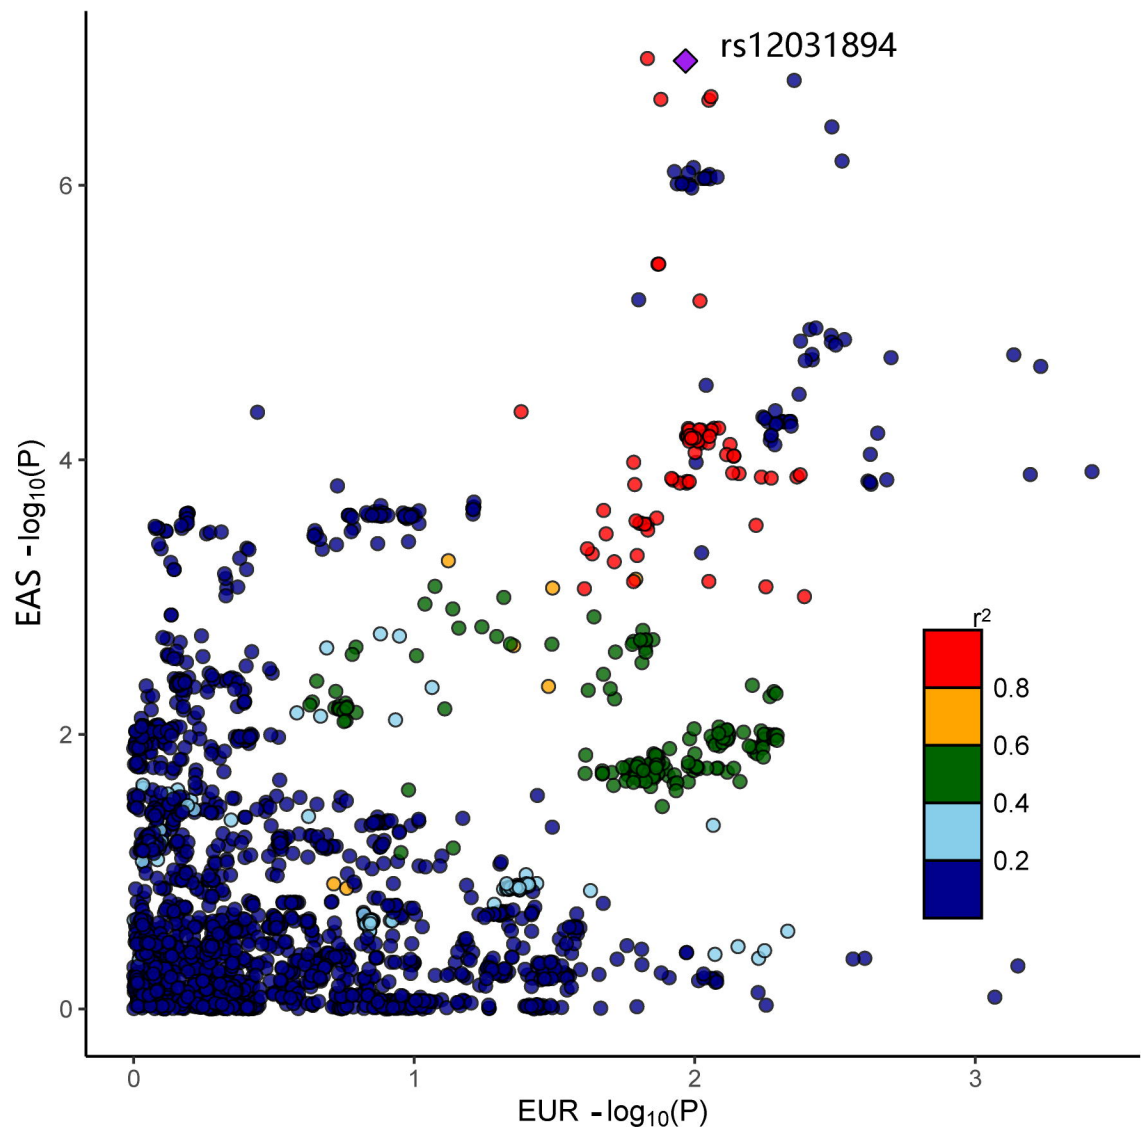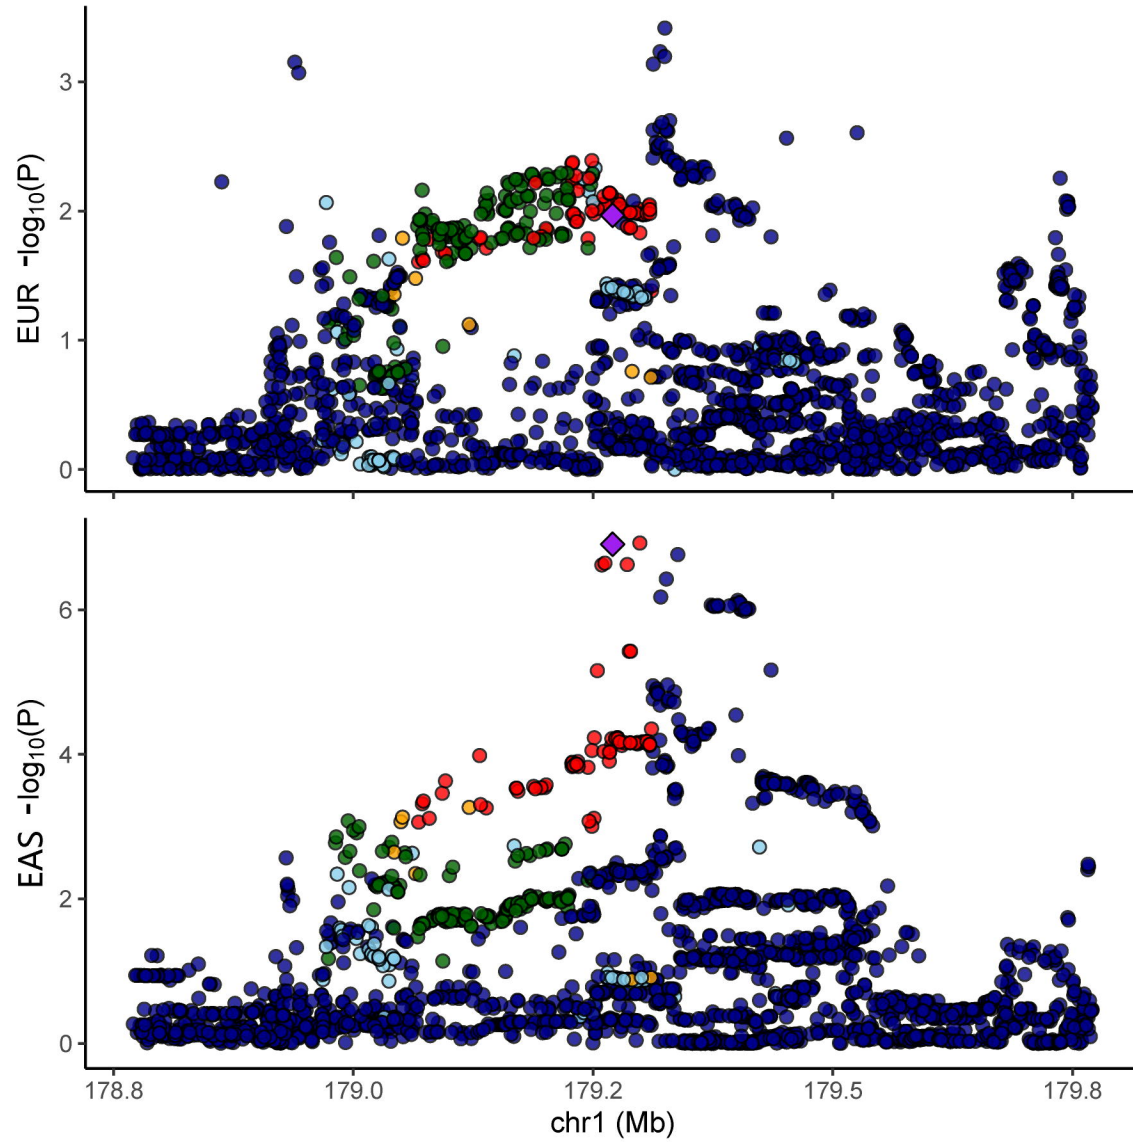**B**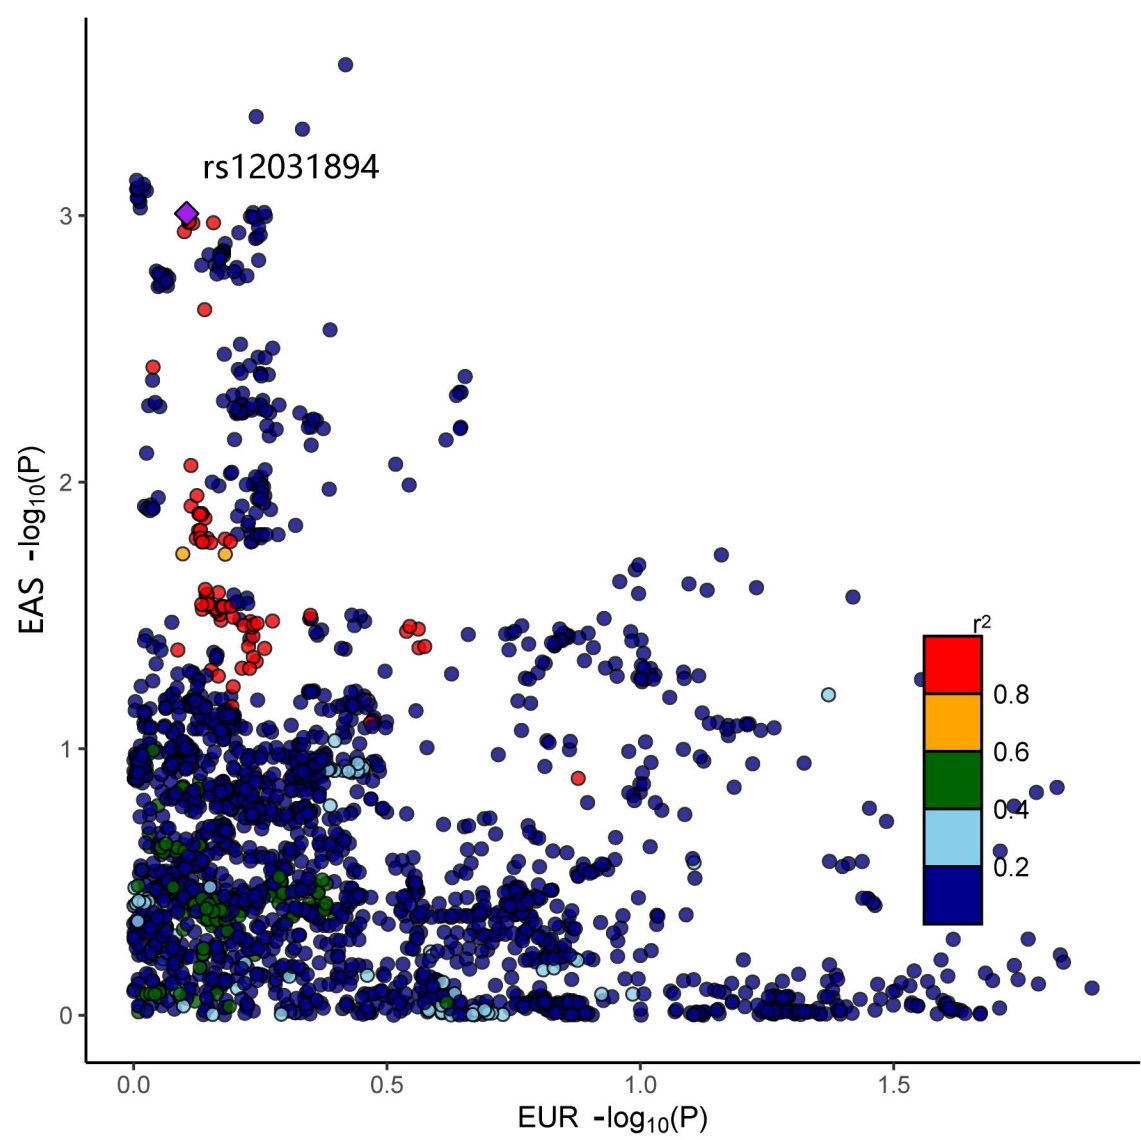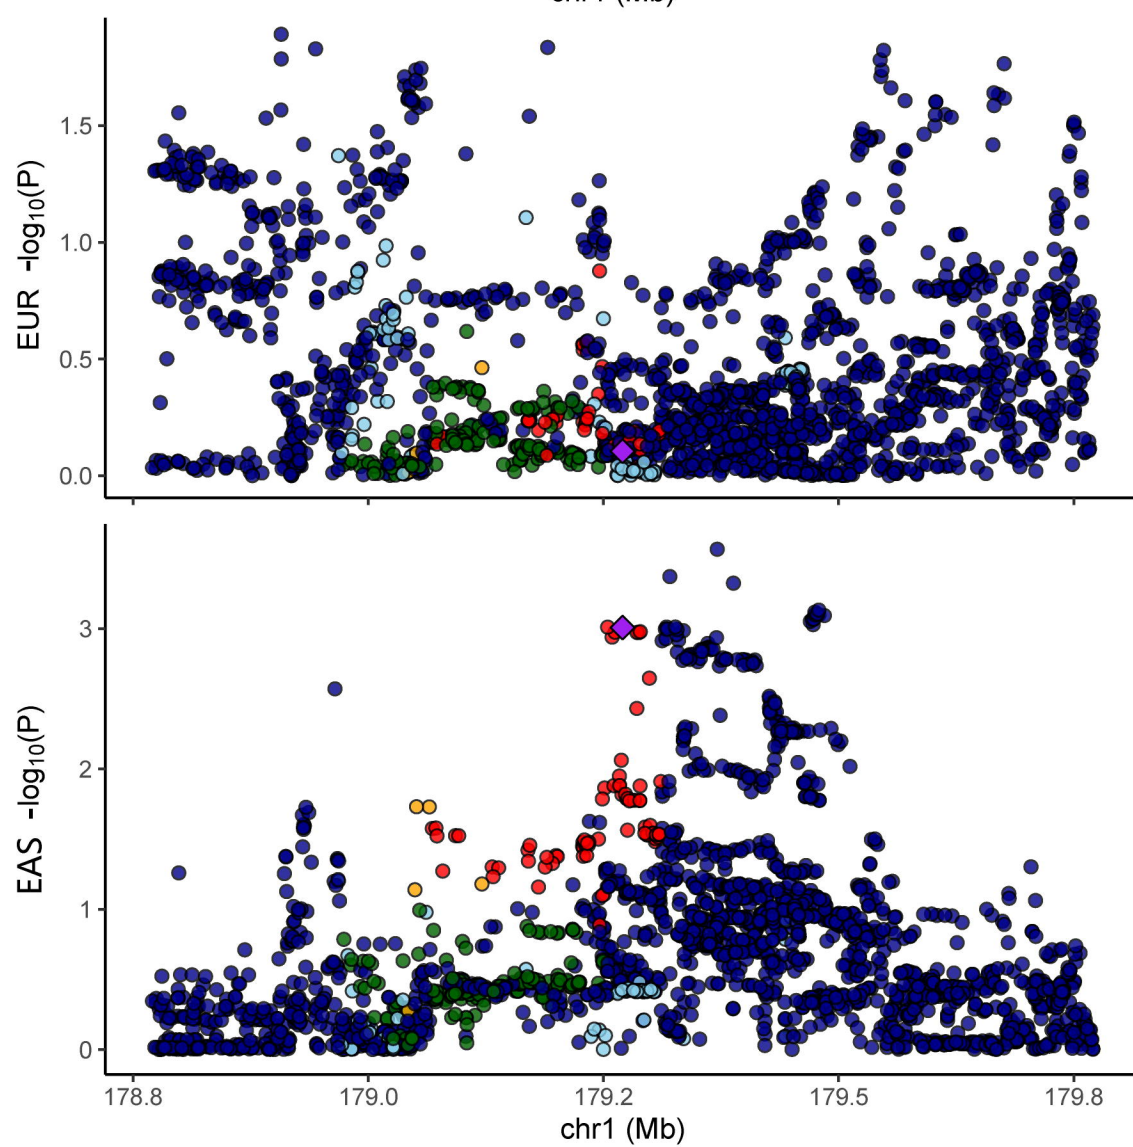

Source: https://www.medrxiv.org/content/10.1101/2024.01.30.24301991v2.full.pdf
